# Supplementary material
Source: PubMed Central journal article supplement (PMC3443622)
Supplement: NIHMS390386-supplement-01.pdf [file NIHMS390386-supplement-01.pdf]

Supplemental Table 1. Effect of VKJP1 and VKJP3 in reversing ABCB1-mediated resistance to colchicine

| Treatment       | KB-3-1                |        |                 | KB-C2                 |          |                 |  |
|-----------------|-----------------------|--------|-----------------|-----------------------|----------|-----------------|--|
|                 | IC <sub>50</sub> (nM) |        | FR <sup>a</sup> | IC <sub>50</sub> (nM) |          | FR <sup>a</sup> |  |
| Colchicine      | 7.31                  | ± 0.03 | 1               | 838.47                | ± 1.49   | 114.7           |  |
| +VKJP1 10 μM    | 7.29                  | ± 1.6  | 1               | 771.24                | ± 38.16  | 105.5           |  |
| +VKJP3 10 μM    | 7.88                  | ± 0.78 | 1.08            | 824.63                | ± 110.94 | 112.8           |  |
| Verapamil 10 μM | 6.99                  | ± 1.13 | 0.96            | 23.54                 | ± 3.48   | 3.22            |  |

<sup>a</sup>Fold-resistance was determined by dividing the IC<sub>50</sub> value for colchicine of KB-C2 cells by IC<sub>50</sub> value of KB-3-1 cells in the absence or presence of VKJP1, VKJP3 or verapamil.

Supplemental Table 2. Effect of VKJP1 and VKJP3 reversing ABCC1-mediated resistance to vincristine

| Treatment     | KB-3-1                |        |                 | KB-CV60               |         |                 |  |
|---------------|-----------------------|--------|-----------------|-----------------------|---------|-----------------|--|
|               | IC <sub>50</sub> (nM) |        | FR <sup>a</sup> | IC <sub>50</sub> (nM) |         | FR <sup>a</sup> |  |
| Vincristine   | 12.69                 | ± 0.59 | 1               | 624.76                | ± 34.71 | 49.25           |  |
| +VKJP1 10 μM  | 13.57                 | ± 4.48 | 1.07            | 541.28                | ± 72.66 | 42.67           |  |
| +VKJP3 10 μM  | 14.81                 | ± 2.67 | 1.17            | 657.69                | ± 71.02 | 51.84           |  |
| PAK104P 10 μM | 8.27                  | ± 5.87 | 0.65            | 37.03                 | ± 27.2  | 2.92            |  |

<sup>a</sup>Fold-resistance was determined by dividing the IC<sub>50</sub> value for vincristine of KB-CV60 cells by IC<sub>50</sub> value of KB-3-1 cells in the absence or presence of VKJP1, VKJP3 or PAK104P.
